# Supplementary material for: Two Novel Betarhabdovirins Infecting Ornamental Plants and the Peculiar Intracellular Behavior of the Cytorhabdovirus in the Liana Aristolochia gibertii
Source: MDPI journal article supplement (doi:10.3390/v16030322), 2024-02-21
Supplement: s1 [file s1]

Supplementary Table S1. List of primers used in the study of the betarhabdoviruses AaCV and FaJV.

| Primer                                                      | Sequence 5'-3'                   | Target position of the specific primers in the virus antigenomic strand | Reference    |
|-------------------------------------------------------------|----------------------------------|-------------------------------------------------------------------------|--------------|
| Degenerate primers for the detection of plant rhabdoviruses |                                  |                                                                         |              |
| RhabF                                                       | GGATMTGGGGBCATCC                 |                                                                         | [14]         |
| RhabR                                                       | GTCCABCCYTTTGYC                  |                                                                         |              |
| Specific primers for the detection of AaCV                  |                                  |                                                                         |              |
| AaCV 1F                                                     | TTGGAGCACATTATACATTAATC          | 67-89                                                                   | [This study] |
| AaCV 1Fa                                                    | AAGAGAGTGCAAGGATTTG              | 170-188                                                                 |              |
| AaCV 1R                                                     | TCTTTCAGTGCAGCATTATG             | 1040-1059                                                               |              |
| AaCV 1Ra                                                    | TTCTAGTCTTTCTGGTACTC             | 420-440                                                                 |              |
| AaCV 2F                                                     | CAATTTGGTTGCTCAATAGTC            | 1005-1025                                                               |              |
| AaCV 2R                                                     | CAGACCTTCCTCTCTTGAG              | 1882-1900                                                               |              |
| AaCV 3F                                                     | GCTGGAAAGAAAGGAGAAG              | 1812-1830                                                               |              |
| AaCV 3R                                                     | TGCCTTATCTTGCTGTTTTG             | 2608-2027                                                               |              |
| AaCV 4F                                                     | GGACCCAGAGGTGATAAAAG             | 2528-2547                                                               |              |
| AaCV 4R                                                     | GACTGATCCTACGTCGTTT              | 3316-3334                                                               |              |
| AaCV 5F                                                     | CGATTAAATTCAGGAGATACAG           | 3246-3268                                                               |              |
| AaCV 5R                                                     | CTTCTCATCATGTTTGAACAG            | 4093-4114                                                               |              |
| AaCV 6F                                                     | ATCATGTTACGCCATTGAC              | 4040-4056                                                               |              |
| AaCV 6R                                                     | AAACCTTCCAAGAGCAAG               | 4970-4988                                                               |              |
| AaCV 7F                                                     | GATTTGCGACTCGAAGATAG             | 4914-4933                                                               |              |
| AaCV 7R                                                     | GCTTTACCAACTTACAGTGATG           | 5857-5878                                                               |              |
| AaCV 8F                                                     | ATGATTGCTGCAAAAGGAG              | 5812-5830                                                               |              |
| AaCV 8R                                                     | AAGATGGAAGTCCCCTATG              | 6803-6821                                                               |              |
| AaCV 9F                                                     | TCTTCTGATCTTGATTTCGAG            | 6755-6776                                                               |              |
| AaCV 9R                                                     | TCCTCGACATCAGAAACTG              | 7684-7702                                                               |              |
| AaCV 10F                                                    | AATCTGAAAGTGTCTGGATTTG           | 7632-7653                                                               |              |
| AaCV 10R                                                    | TTAAAAAGGTGAAAGGTAGTCTC          | 8589-8611                                                               |              |
| AaCV 11F                                                    | CTGCATAAATATGGATTTCGAAAAG        | 8543-8567                                                               |              |
| AaCV 11R                                                    | TATCTTGGCACAGTATTGAATAG          | 9603-9625                                                               |              |
| AaCV 12F                                                    | AAGGGTTTAGAGAAGAAAGGA            | 9538-9558                                                               |              |
| AaCV 12R                                                    | TTATACTTTTGTCTGCATTGC            | 10453-10474                                                             |              |
| AaCV 13F                                                    | CAACAATCTAGCGTCCATTAC            | 10385-10405                                                             |              |
| AaCV 13R                                                    | GCAAAACCATCTCTGATCTC             | 11212-11231                                                             |              |
| AaCV 14F                                                    | TTAAAGGGATGTTGAGTATGTTT          | 11161-11183                                                             |              |
| AaCV 14R                                                    | CATTGGATAAATTCAGTATGTTTTC        | 12054-12078                                                             |              |
| AaCV 15F                                                    | AGCATACCCAACACTGAAC              | 12000-12018                                                             |              |
| AaCV 15Fa                                                   | CAACTCTCTCTGCGATTATTAG           | 12747-12768                                                             |              |
| AaCV 15R                                                    | ATAAATGTATGATGACATAGTTTACTG      | 13073-13100                                                             |              |
| AaCV RACE-5'                                                | GGGTGGTTCTATGAAAGCGGATAACACAATGG | 12600-12632                                                             |              |
| AaCV RACE-3'                                                | TCTCCAAACGGATTTGCTGGAGCCTTCG     | 552-579                                                                 |              |
| Specific primers for the detection of FaJV                  |                                  |                                                                         |              |
| FaJV_N_F                                                    | GAGCGGTTGTGAGTTAGCAG             | 1039-1058                                                               | [This study] |
| FaJV_N_R                                                    | TCGGTGTGTATCTTGCCTGT             | 1409-1428                                                               |              |
